# Supplementary material for: A Chemo-Ecological Investigation of Dendrilla antarctica Topsent, 1905: Identification of Deceptionin and the Effects of Heat Stress and Predation Pressure on Its Terpene Profiles
Source: MDPI journal article supplement (doi:10.3390/md21090499), 2023-09-19
Supplement: s1 [file s1]

## Supplementary Material

### A Chemo-Ecological Investigation of *Dendrilla antarctica* Topsent, 1905: Identification of Deceptionin and the Effects of Heat Stress and Predation Pressure on Its Terpene Profiles

Paula De Castro-Fernández<sup>1,2,3,4,\*</sup>, Carlos Angulo-Preckler<sup>5</sup>, Cristina García-Aljaro<sup>3</sup>, Conxita Avila<sup>1,2</sup>, and Adele Cutignano<sup>4</sup>

Figure S1. EIMS spectrum of 9,11-dihydrogracilin A (**1**).

Figure S2. EIMS spectrum of compound **2**.

Figure S3. EIMS spectrum of compound **3**.

Figure S4. EIMS spectrum of membranolid (**4**).

Figure S5. EIMS spectrum of aplysulphurin (**5**).

Figure S6. EIMS spectrum of tetrahydroaplysulphurin-1 (**6**).

Figure S7. EIMS spectrum of deceptionin (**7**).

Figure S8. HRESI-MS of deceptionin (**7**).

Figure S9. <sup>1</sup>H NMR spectrum (400 MHz, CDCl<sub>3</sub>) of deceptionin (**7**).

Figure S10. <sup>13</sup>C NMR spectrum (100 MHz, CDCl<sub>3</sub>) of deceptionin (**7**).

Figure S11. <sup>1</sup>H, <sup>1</sup>H COSY NMR spectrum (400 MHz, CDCl<sub>3</sub>) of deceptionin (**7**).

Figure S12. <sup>1</sup>H, <sup>1</sup>H TOCSY NMR spectrum (400 MHz, CDCl<sub>3</sub>) of deceptionin (**7**).

Figure S13. <sup>1</sup>H, <sup>13</sup>C edHSQC NMR spectrum (400 MHz, CDCl<sub>3</sub>) of deceptionin (**7**).

Figure S14. <sup>1</sup>H, <sup>13</sup>C HMBC NMR spectrum (400 MHz, CDCl<sub>3</sub>) of deceptionin (**7**).

Figure S15. <sup>1</sup>H, <sup>1</sup>H NOESY NMR spectrum (400 MHz, CDCl<sub>3</sub>) of deceptionin (**7**).

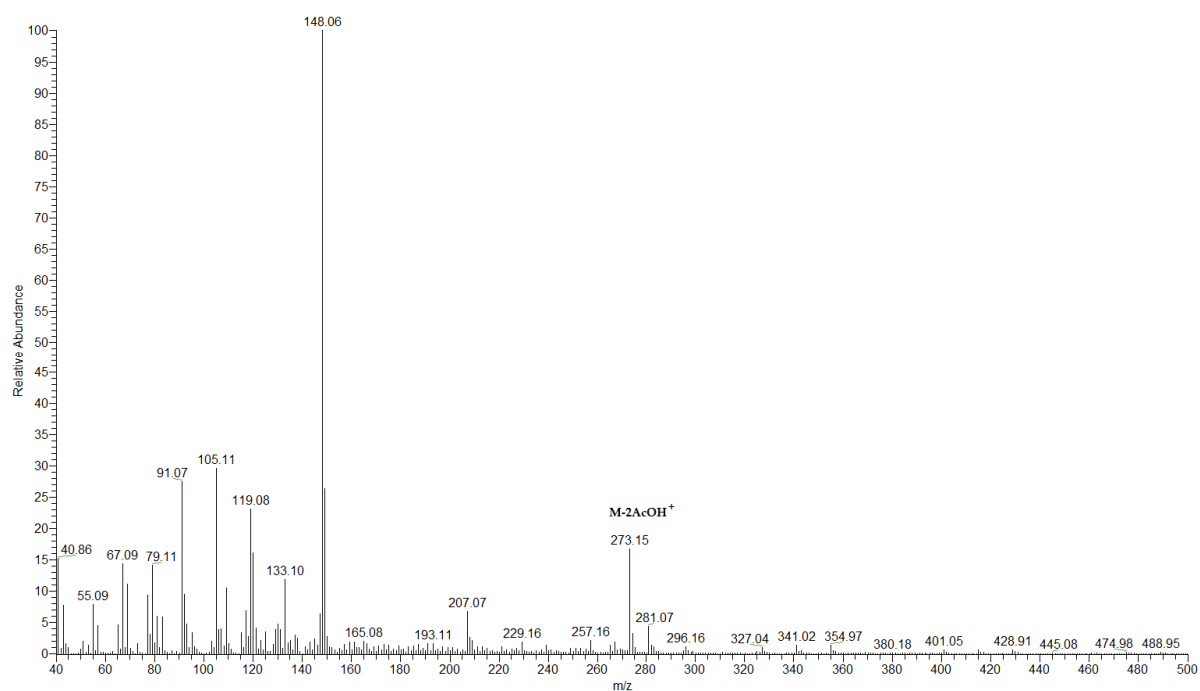

Figure S1. EIMS spectrum of 9,11-dihydrogracilin A (**1**).

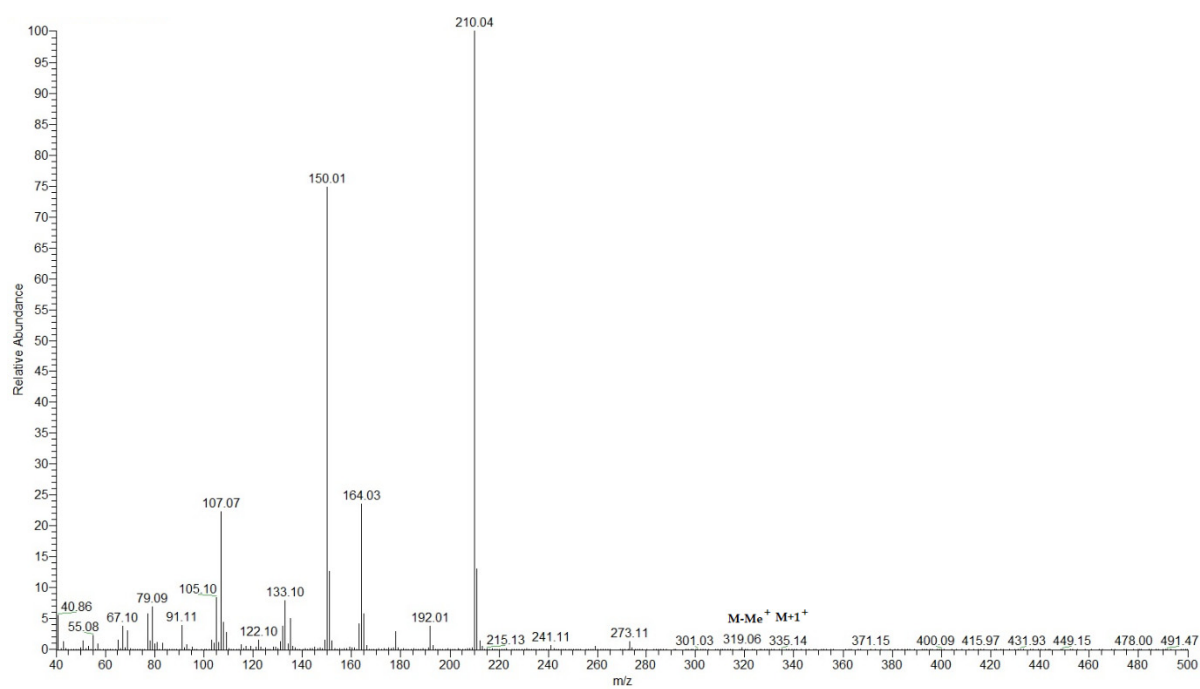

Figure S2. EIMS spectrum of compound **2**.

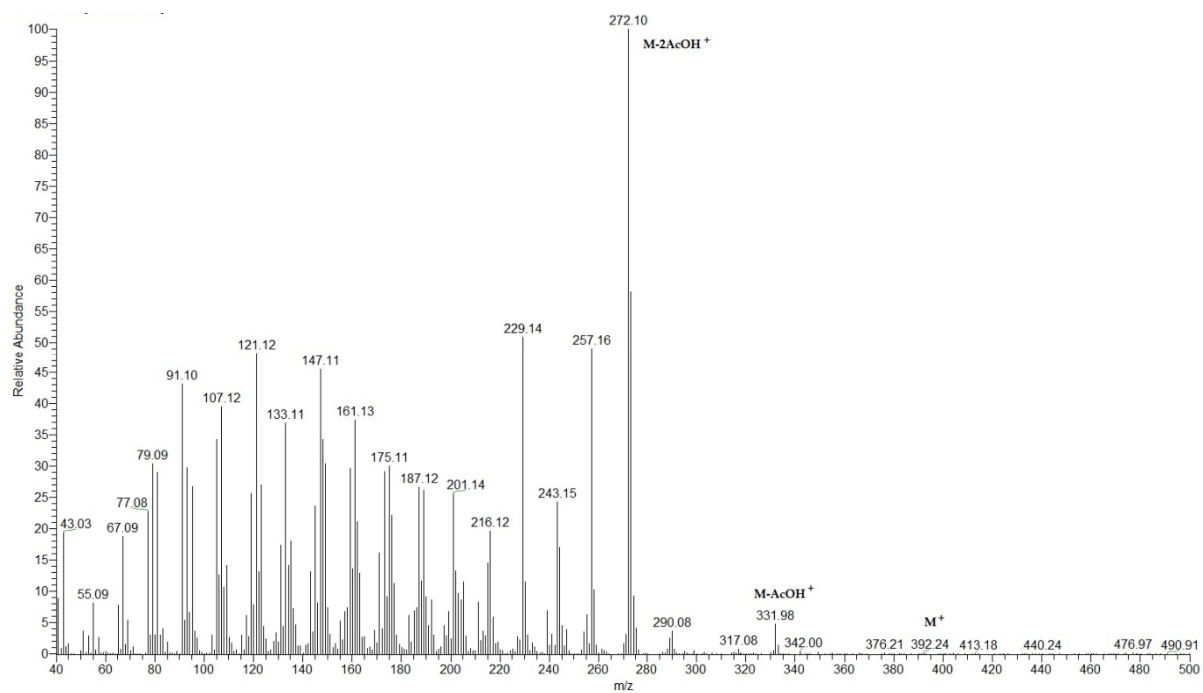

Figure S3. EIMS spectrum of compound **3**.

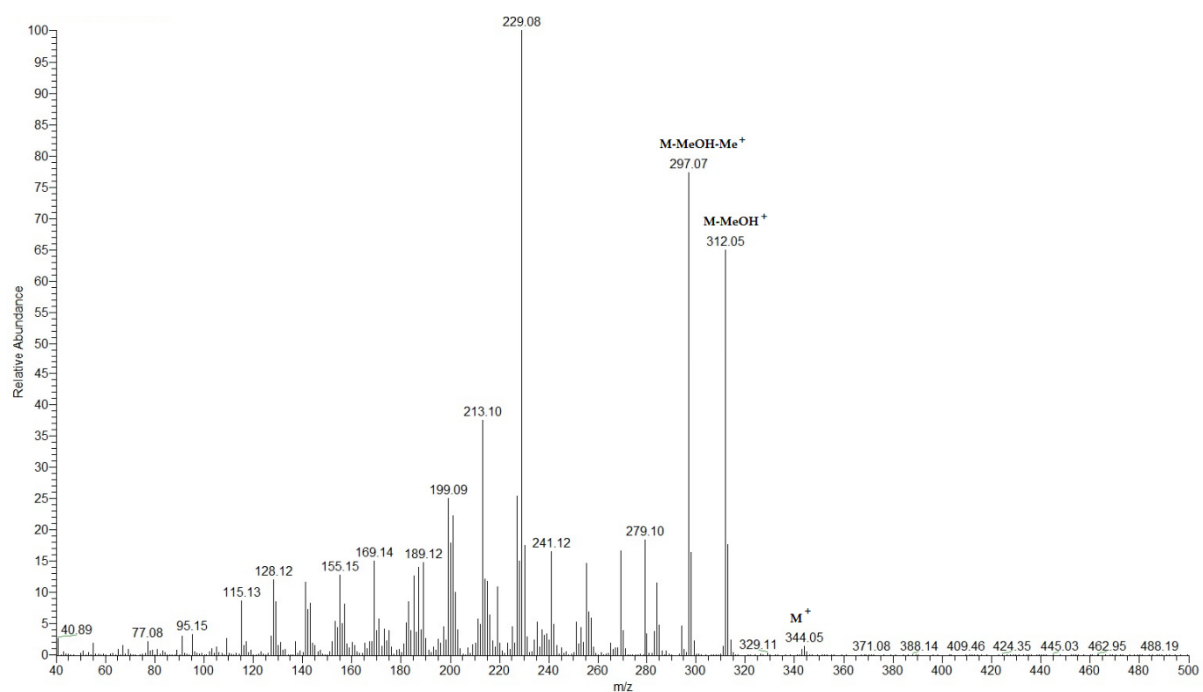

Figure S4. EIMS spectrum of membranolid (**4**).

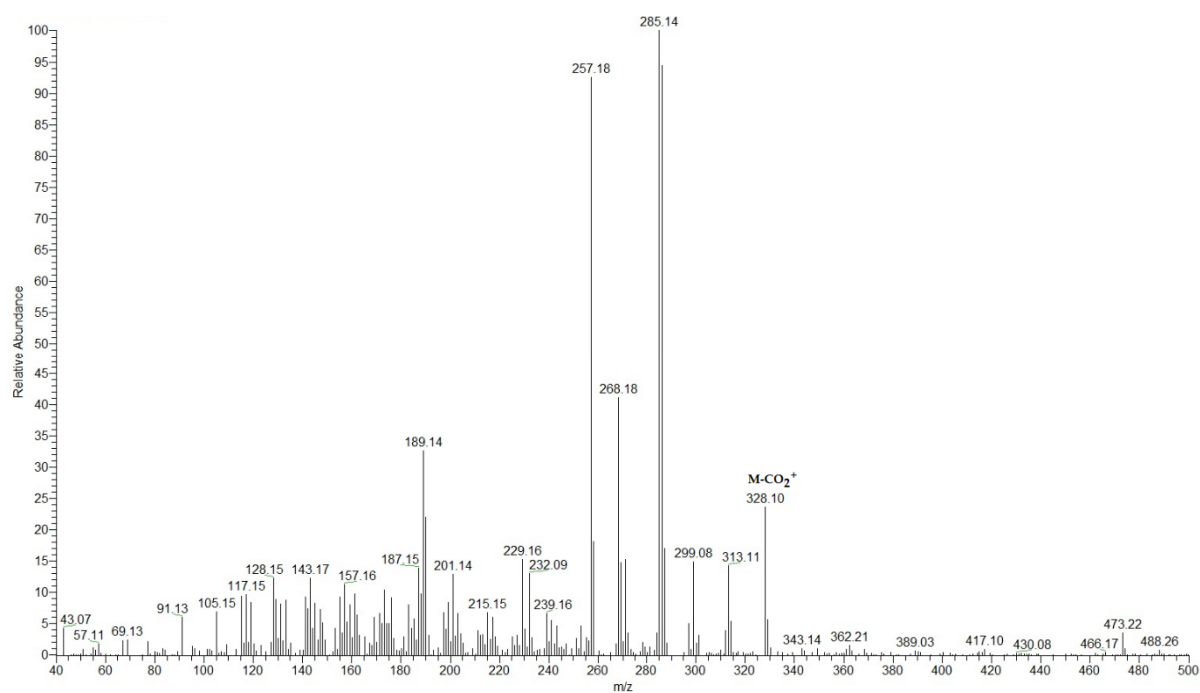

Figure S5. EIMS spectrum of alysulphurin (5).

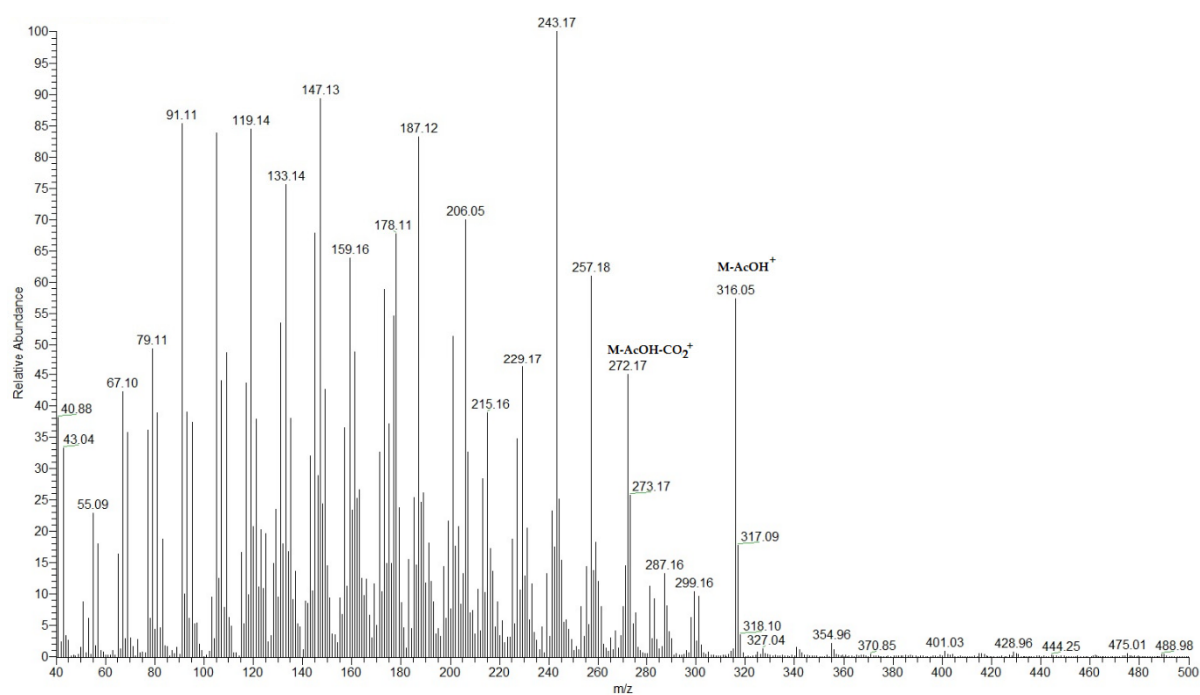

Figure S6. EIMS spectrum of tetrahydroalysulphurin-1 (6)

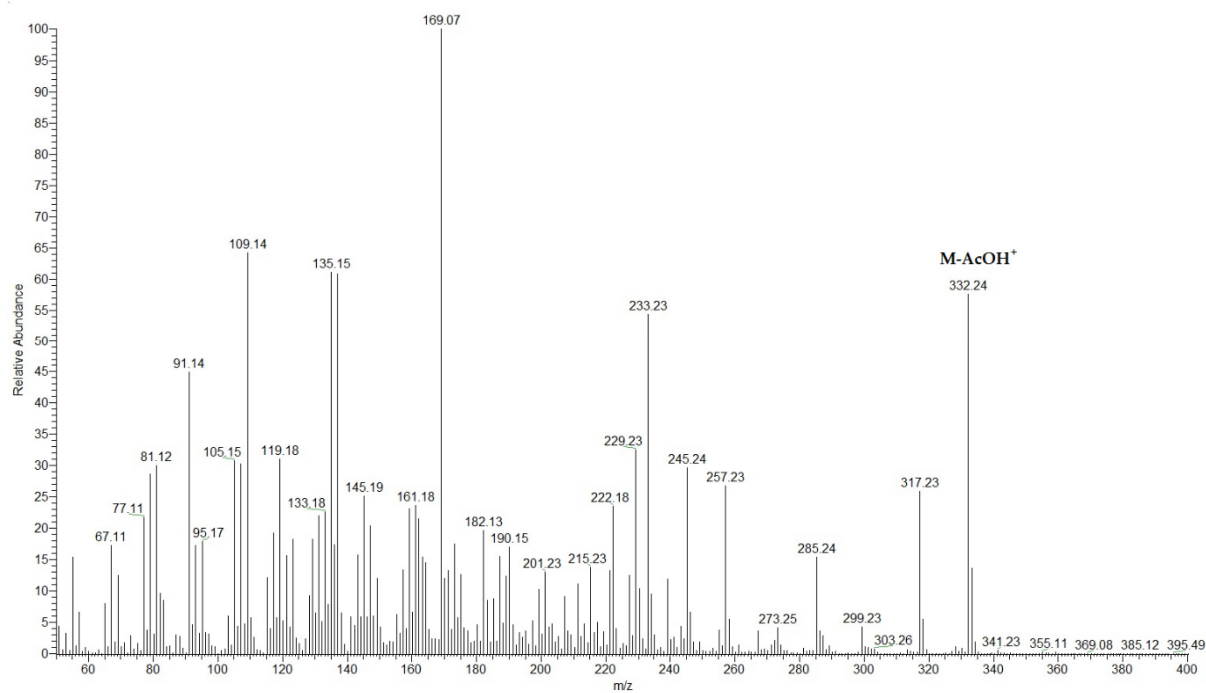

Figure S7. EIMS spectrum of deceptionin (7).

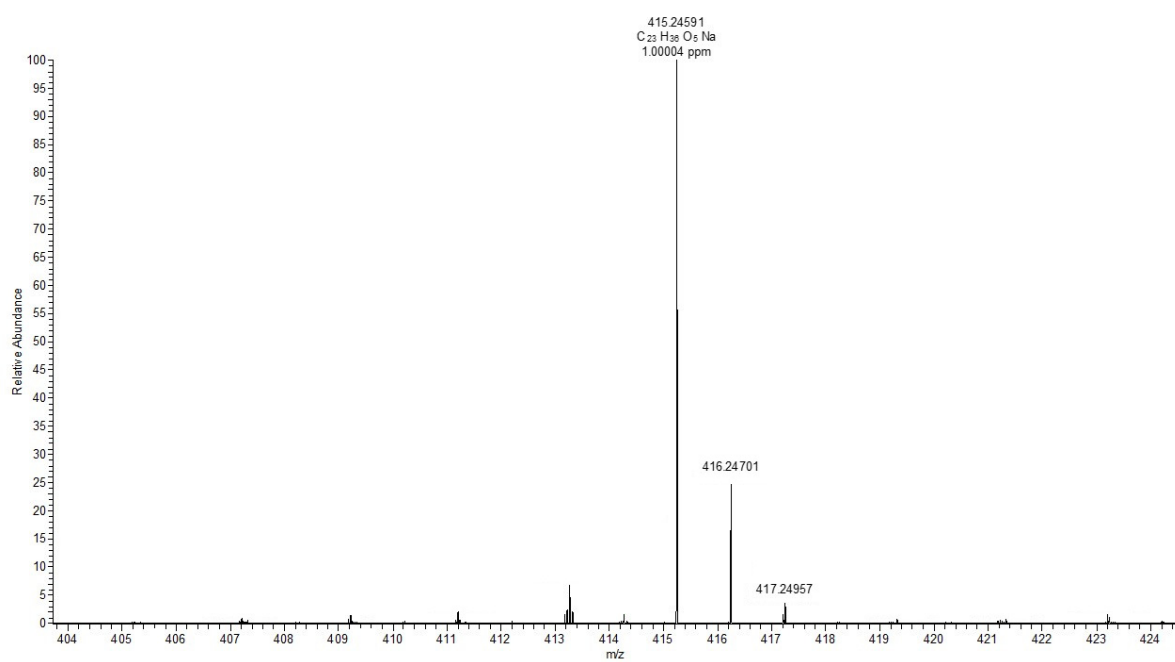

Figure S8. HRESI-MS of deceptionin (7).

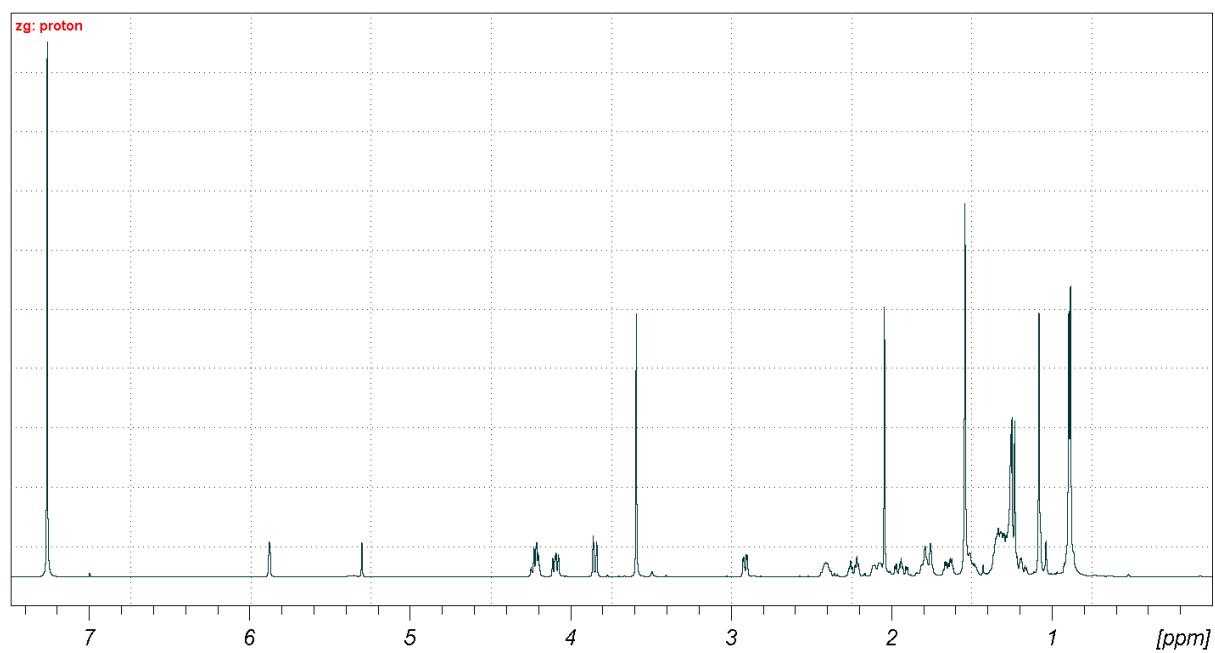

Figure S9.  $^1\text{H}$  NMR spectrum (400 MHz,  $\text{CDCl}_3$ ) of deceptionin (**7**).

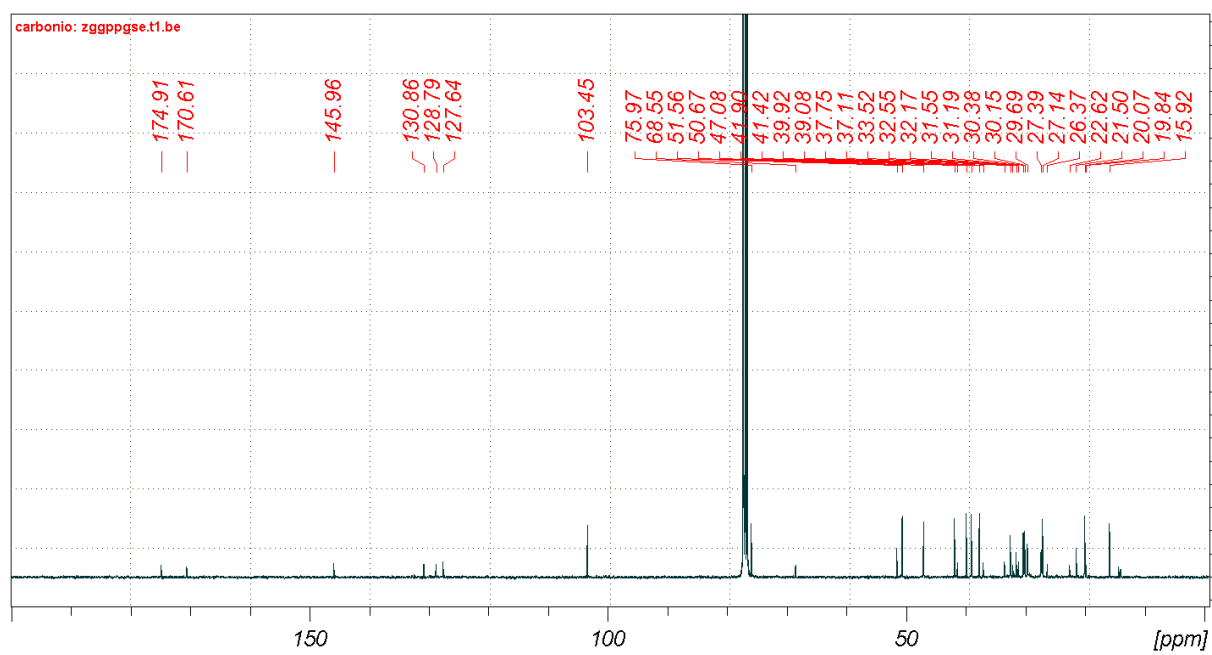

Figure S10.  $^{13}\text{C}$  NMR spectrum (100 MHz,  $\text{CDCl}_3$ ) of deceptionin (**7**).

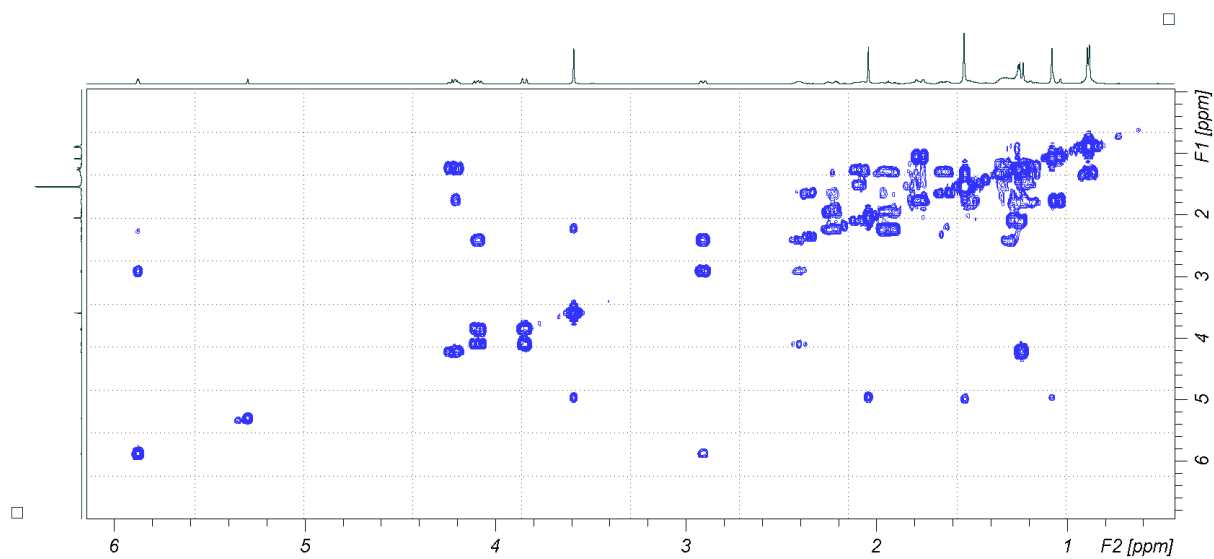

Figure S11.  $^1\text{H}$ ,  $^1\text{H}$  COSY NMR spectrum (400 MHz,  $\text{CDCl}_3$ ) of deceptionin (7).

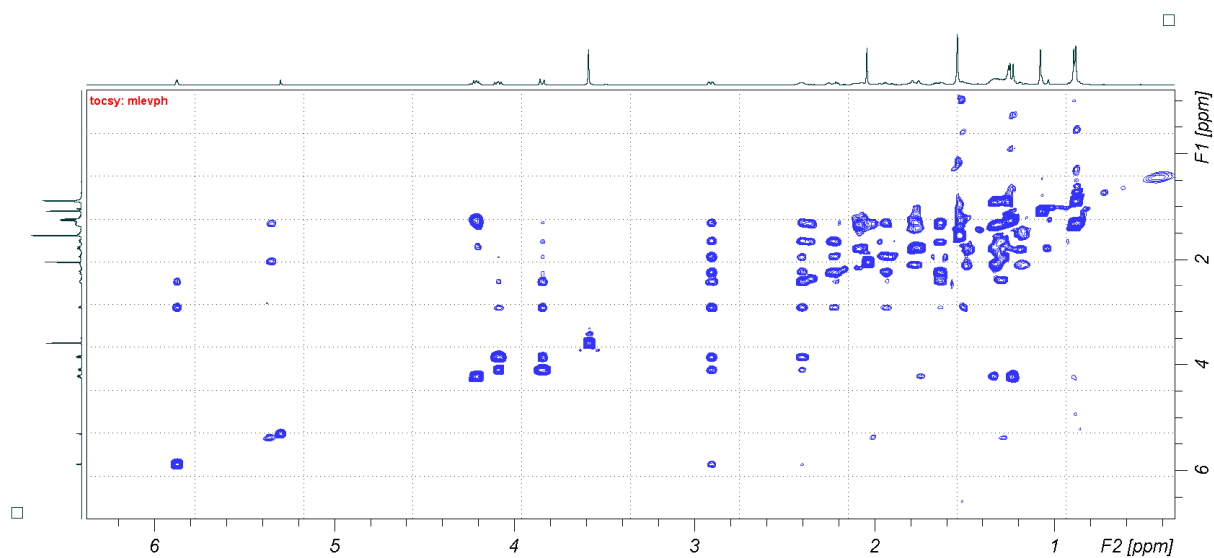

Figure S12.  $^1\text{H}$ ,  $^1\text{H}$  TOCSY NMR spectrum (400 MHz,  $\text{CDCl}_3$ ) of deceptionin (7).

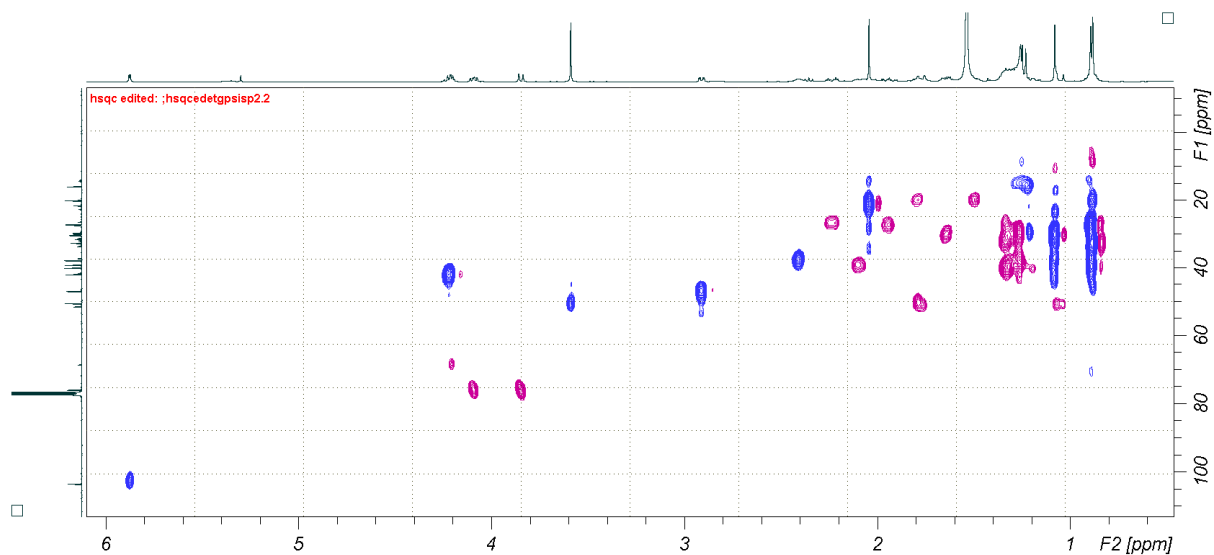

Figure S13.  $^1\text{H}$ ,  $^{13}\text{C}$  edHSQC NMR spectrum (400 MHz,  $\text{CDCl}_3$ ) of deceptionin (**7**).

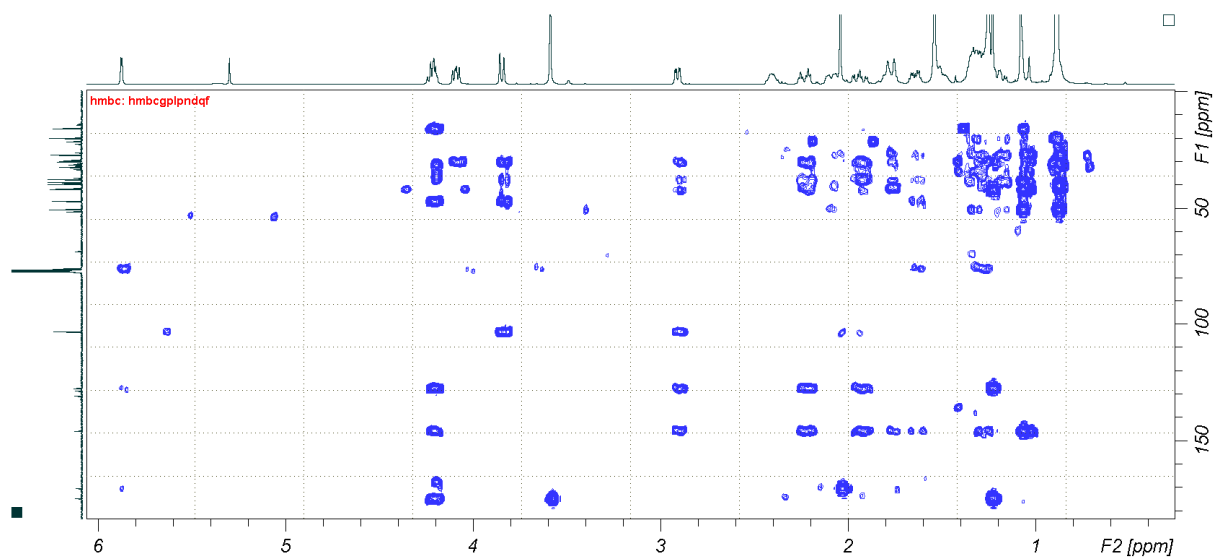

Figure S14.  $^1\text{H}$ ,  $^{13}\text{C}$  HMBC NMR spectrum (400 MHz,  $\text{CDCl}_3$ ) of deceptionin (**7**).



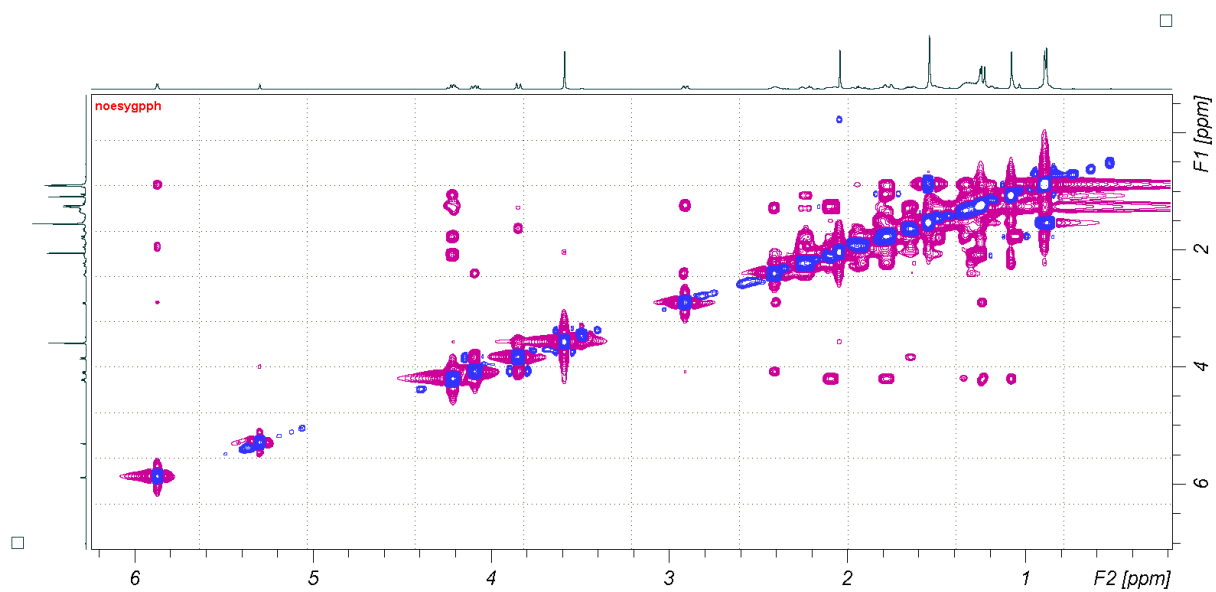

Figure S15.  $^1\text{H}$ ,  $^1\text{H}$  NOESY NMR spectrum (400 MHz,  $\text{CDCl}_3$ ) of deceptionin (**7**).
